# Supplementary material for: Green synthesis of Bi2Se3 hierarchical nanostructure and its electrochemical properties
Source: Royal Society of Chemistry journal article supplement (doi:10.1039/c3ra46473c), 2014-01-01
Supplement: c3ra46473c.pdf [file c3ra46473c.pdf]

## Electronic Supplementary Information

### “Green” synthesize $\text{Bi}_2\text{Se}_3$ hierarchical nanostructure and its electrochemical properties

Haiming Xu,<sup>a</sup> Gang Chen,<sup>\*a</sup> Rencheng Jin,<sup>b</sup> Dahong Chen,<sup>a</sup> Jian Pei<sup>a</sup> and Yu Wang<sup>a</sup>

<sup>a</sup>Department of Chemistry, Harbin Institute of Technology, Harbin 150001, P. R. China

<sup>b</sup>School of Chemistry & Materials Science, Ludong University, 186 Hongqi Road, Yantai, Shandong Province 264025, P. R. China

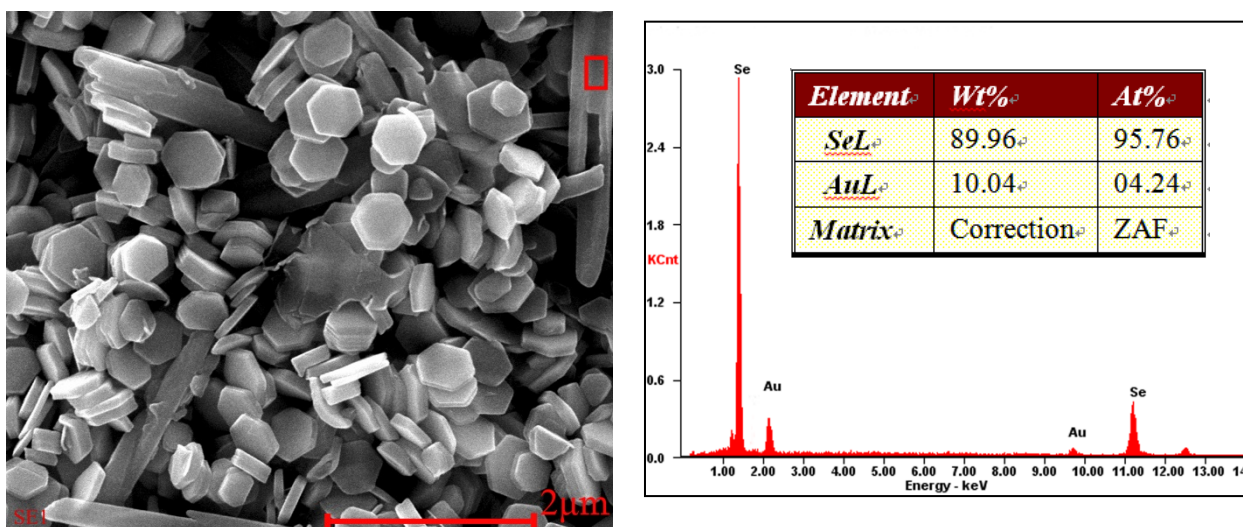

**Fig. S1** FESEM image (left) and EDS (right) of the selenium rods prepared by microwave-assisted heating in EG solution at 5 min.

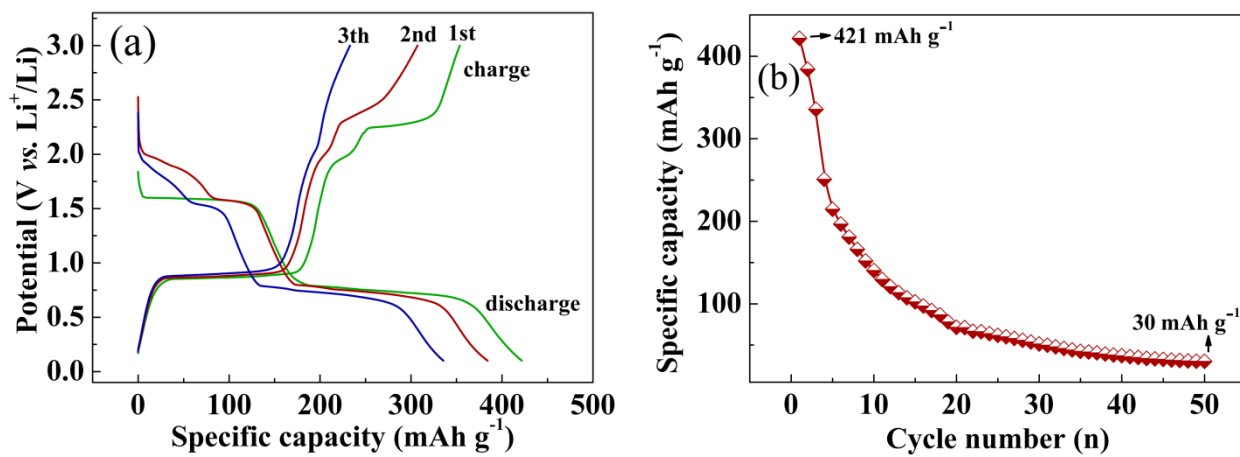

**Fig. S2** Electrochemical performance of single  $\text{Bi}_2\text{Se}_3$  nanoplates: (a) discharge and charge curves, (b) the cycle performance.
